# Supplementary material for: Substitution of Coxsackievirus A16 VP1 BC and EF Loop Altered the Protective Immune Responses in Chimera Enterovirus A71
Source: Preprints.org preprint supplement (doi:10.20944/preprints202307.0846.v1), 2023-07-13
Supplement: Supplementary file 1 [file supplementary]

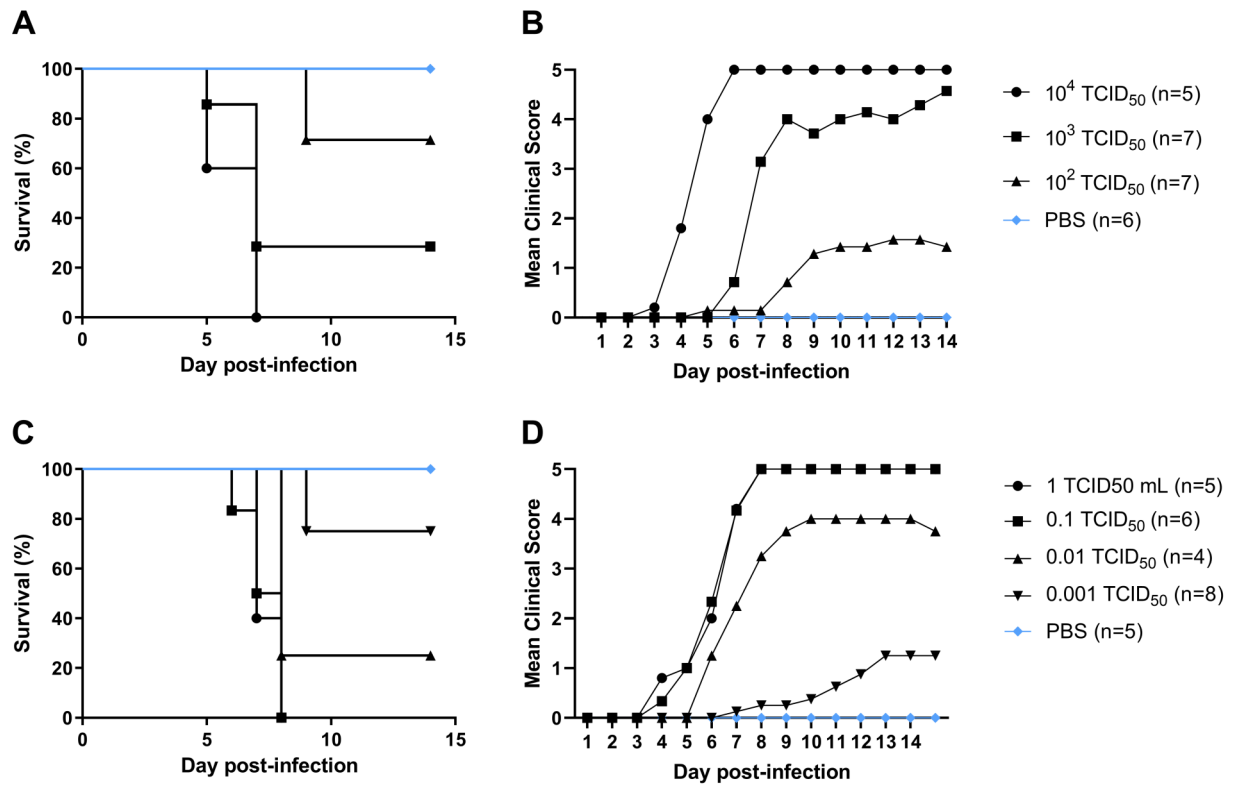

Figure S2: LD<sub>50</sub> determination of MP4 EV-A71 and WT CV-A16 in newborn mice. (A) Survival curve and (B) mean clinical score of mice inoculated with MP4 EV-A71. (C) Survival curve and (D) mean clinical score of mice inoculated with CV-A16. The mice were monitored for 14 days for survival and clinical symptoms. Clinical scores were defined as: 0, healthy; 1, weak or less active; 2, hunched posture and lethargy; 3, one-limb paralysis; 4, two-limb paralysis; 5, moribund or dead.

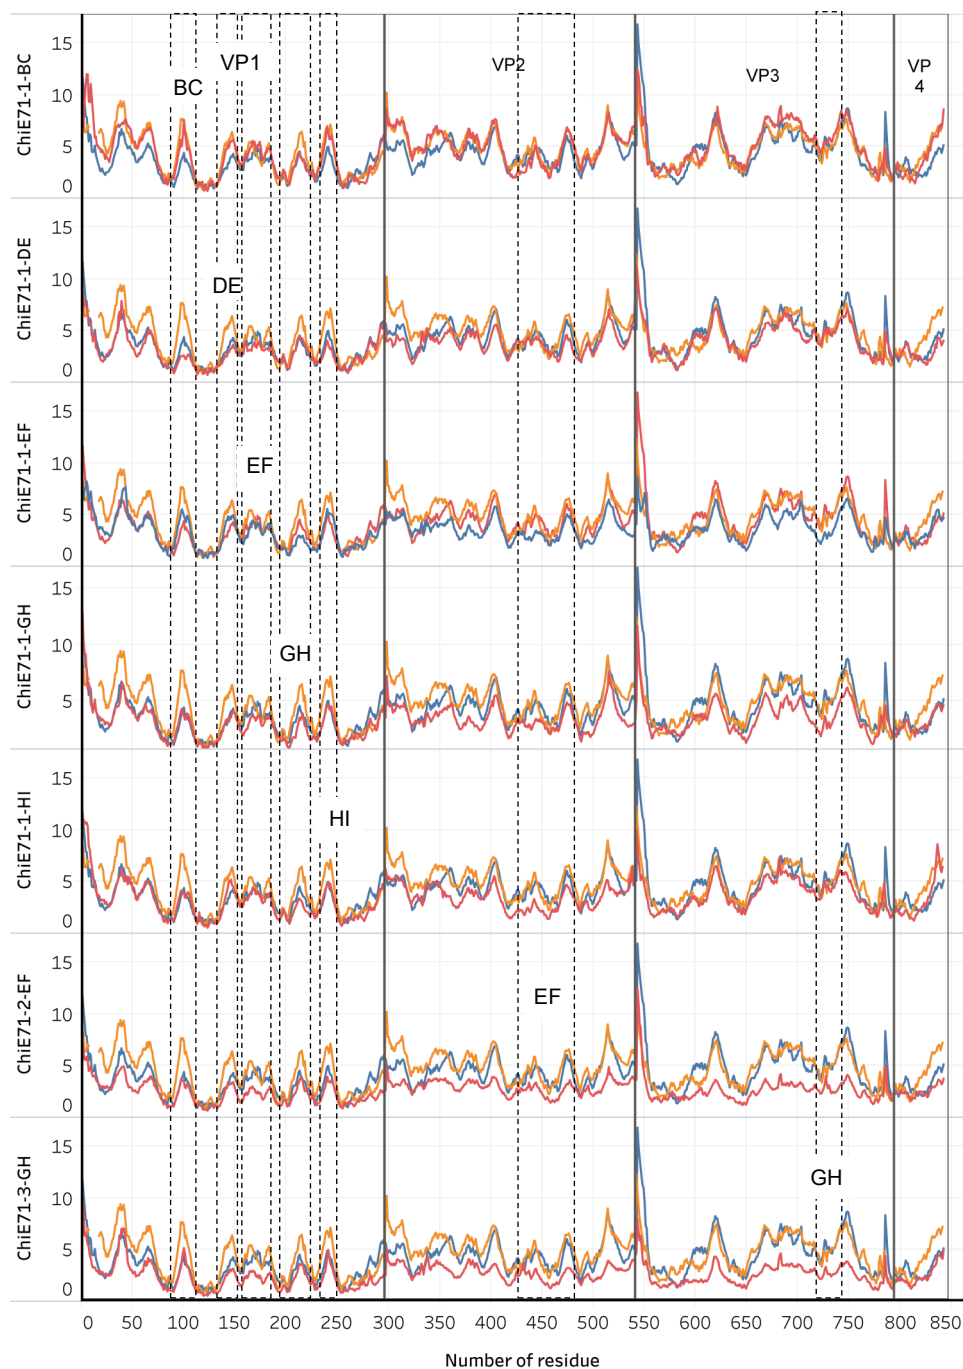

Figure S3: RMSF of VP1 of ChiE71, WT EV-A71 and WT CV-A16. MD simulations were performed using AMBER 20 with trajectory analysis using the CPPTRAJ module. The y-axis of each graph is the average RMSF of each residue during 10 ns MD simulation. ChiE71, WT EV-A71 and WT CV-A16 are depicted in red, blue and orange, respectively.

|            |                                                               |     |
|------------|---------------------------------------------------------------|-----|
| Consensus  | MGSQVSTQRS GSHENSNSATEGSTINYTTINYKDSYAATAGKQSLKQDPDKFANPVKDI  | 60  |
| Strain 41  | .....                                                         | 60  |
| Strain E59 | .....                                                         | 60  |
| Consensus  | FTEMAAPLKSPSAEACGYSDRVAQLTIGNSTITTQEAAANIIVGYGEWPSYCSDDDATAVD | 120 |
| Strain 41  | .....                                                         | 120 |
| Strain E59 | .....                                                         | 120 |
| Consensus  | KPTRPDVSVNRFYTLDTKLWEKSSKGWYWKFPDVLTTETGVFGQNAQFHYLYRSGFCIHVQ | 180 |
| Strain 41  | .....                                                         | 180 |
| Strain E59 | .....                                                         | 180 |
| Consensus  | CNASKFHQGALLVAILPEYVIGTVAGGTGTEDSHPPYKQTQPGADGFELQHPYVLDAGIP  | 240 |
| Strain 41  | .....                                                         | 240 |
| Strain E59 | .....                                                         | 240 |
| Consensus  | ISQLTVCPHQWINLRTNNCATIIVPYMNTLPFDSALNHCNFGLLVVPISPLDFDQGATPV  | 300 |
| Strain 41  | .....                                                         | 300 |
| Strain E59 | .....                                                         | 300 |
| Consensus  | IPITITJAPMCSEFAGLRQAVTQGFTEPKPGTNQFLTDDGVSAPILPNFHPTPCIHIP    | 360 |
| Strain 41  | .....L.....                                                   | 360 |
| Strain E59 | .....I.....                                                   | 360 |
| Consensus  | GEVRNLLLELCQVETILEVNNVPTNATSLMERLRFVPSAQAGKGELCAVFRADPGRDGPWQ | 420 |
| Strain 41  | .....                                                         | 420 |
| Strain E59 | .....                                                         | 420 |
| Consensus  | STMLGQLCGYYTQWGSLEVTFMFTGSGFMATGKMLIAYTPPGGPLPKDRATAMLGTHVIW  | 480 |
| Strain 41  | .....                                                         | 480 |
| Strain E59 | .....                                                         | 480 |
| Consensus  | DFGLQSSVTLVIPWISNTHYRAHARDGVFDYYTTGLXSIWYQTNVVPVIGAPNTAYIIAL  | 540 |
| Strain 41  | .....V.....                                                   | 540 |
| Strain E59 | .....I.....                                                   | 540 |
| Consensus  | AAAQKNFTMKLCKDTSILQTASIQGDRVADVIESSIGBSVSRALTQALPAPTQNTQVS    | 600 |
| Strain 41  | .....D.....                                                   | 600 |
| Strain E59 | .....N.....                                                   | 600 |
| Consensus  | SHRLDTGEVPALQAAEXGASSNTSDESMIETRCVLNSHSTAETTLDSFFSRAGLVGEIDL  | 660 |
| Strain 41  | .....I.....                                                   | 660 |
| Strain E59 | .....V.....                                                   | 660 |
| Consensus  | PLEGTTNPNGYANWDIDITGYAQMRKVELFTYMRFDAEFTFVACTPTGZVVPQLLQYMF   | 720 |
| Strain 41  | .....E.....                                                   | 720 |
| Strain E59 | .....Q.....                                                   | 720 |
| Consensus  | VPPGAPKPESRESLAWQTATNPVSFVKLTDPPAQVSVPFMSPASAYQWFYDGYPTFGEHK  | 780 |
| Strain 41  | .....                                                         | 780 |
| Strain E59 | .....                                                         | 780 |
| Consensus  | QEKDLEYGACPNNMMGTFSVRTVGSXSKYPLVVRIYMRMKHVRAWIPRPMRNQNYLFKA   | 840 |
| Strain 41  | .....S.....                                                   | 840 |
| Strain E59 | .....L.....                                                   | 840 |

|            |                             |     |
|------------|-----------------------------|-----|
| Consensus  | NPNYAGNSIKPTGTSRTAITTL----- | 900 |
| Strain 41  | .....                       | 900 |
| Strain E59 | .....                       | 900 |

Figure S4: Alignment of EV-A71 P1 amino acid sequence of strain E59 (JN874551.1) and strain 41 (AF316321). Difference of amino acids of the two strains are indicated respectively.
